# Supplementary material for: Tuneable-by-design copper oxide nanoparticles in ionic liquid nanofluids
Source: Royal Society of Chemistry journal article supplement (doi:10.1039/d3nr04159j), 2023-01-01
Supplement: d3nr04159j1.pdf [file d3nr04159j1.pdf]

## Supporting Information

### Tunable-by-design copper oxide nanoparticles in ionic liquid nanofluids

Claire Boudie,<sup>a</sup> Manuel Maréchal,<sup>b</sup> Guillaume Ah-Lung,<sup>c</sup> Johan Jacquemin,<sup>a,c</sup> Peter Nockemann<sup>\*a</sup>

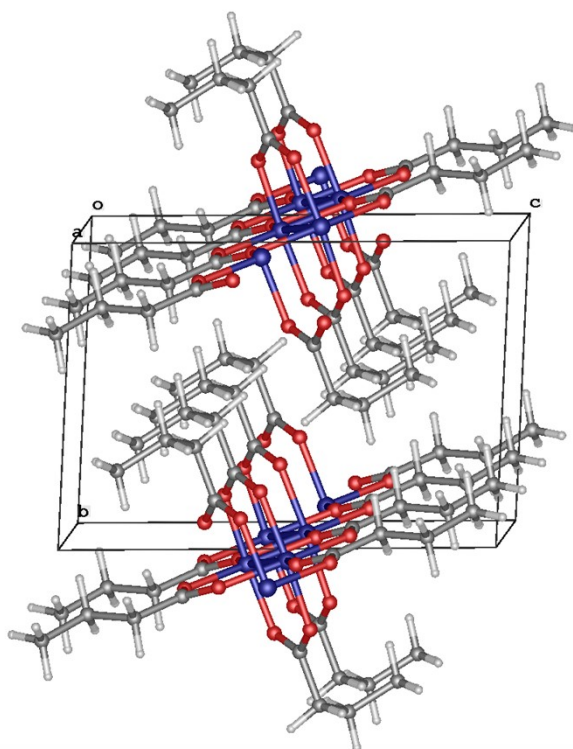

**Figure S1.** 1-D coordination polymer packing in the crystal structure of  $\text{Cu}_2(\text{C}_3\text{H}_7\text{CO}_2)_4$ .

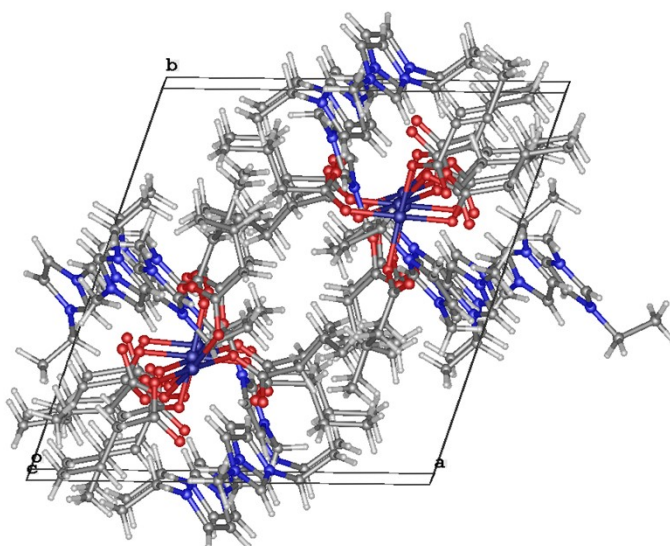

**Figure S2.** Square-planar coordination packing in the crystal structure of  $[\text{C}_2\text{MIm}]_2[\text{Cu}(\text{C}_3\text{H}_7\text{CO}_2)_4]$ .

## Supporting Information

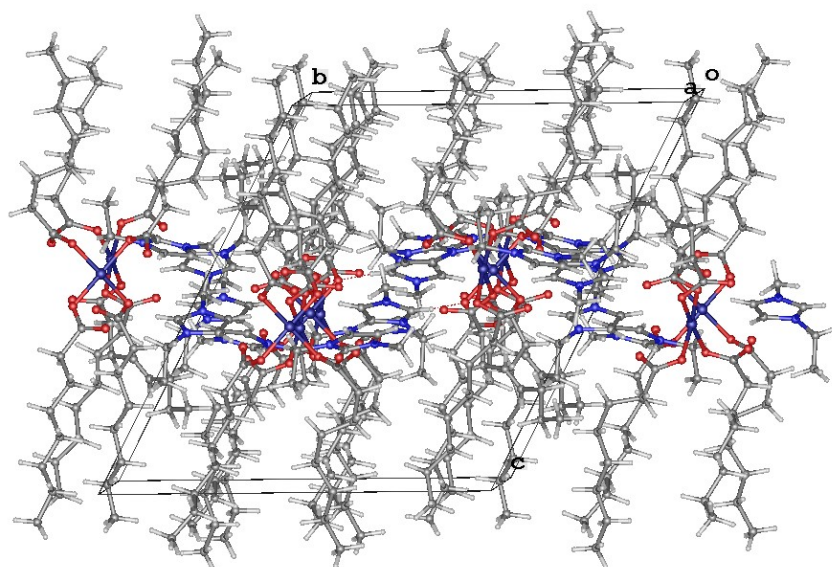

**Figure S3.** Square-planar coordination packing in the crystal structure of  $[\text{C}_2\text{MIm}]_2[\text{Cu}(\text{C}_7\text{H}_{15}\text{CO}_2)_4]$ .

## Supporting Information

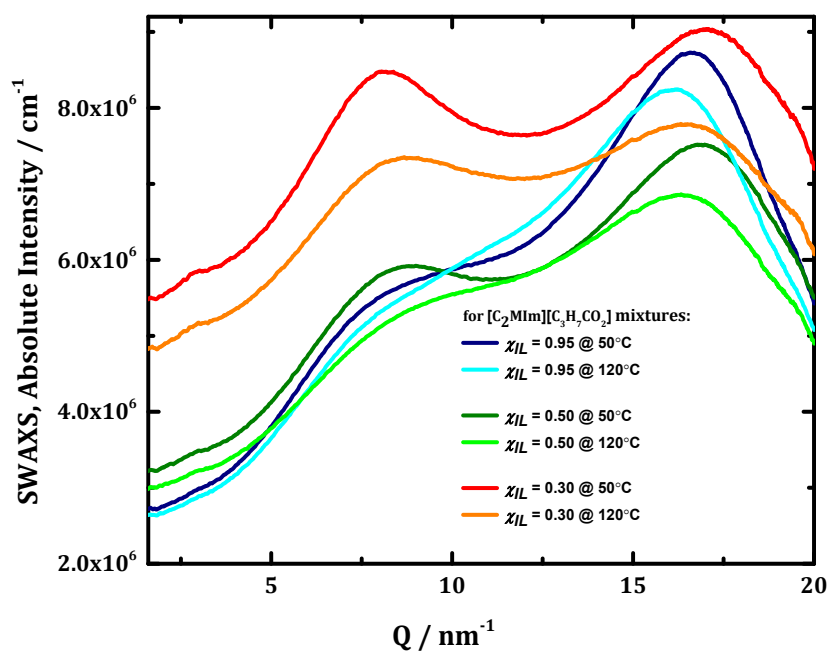

**Figure S4.** SWAXS patterns of  $[\text{C}_2\text{MIm}][\text{C}_3\text{H}_7\text{CO}_2]$  in binary and ternary mixtures with water and copper(II) butanoate at  $50^\circ\text{C}$  for the composition  $\chi_{\text{IL}} = 0.95$  (Blue),  $\chi_{\text{IL}} = 0.50$  (green) and  $\chi_{\text{IL}} = 0.30$  (red), and at  $120^\circ\text{C}$  for the composition  $\chi_{\text{IL}} = 0.95$  (cyan),  $\chi_{\text{IL}} = 0.50$  (green) and  $\chi_{\text{IL}} = 0.30$  (orange).

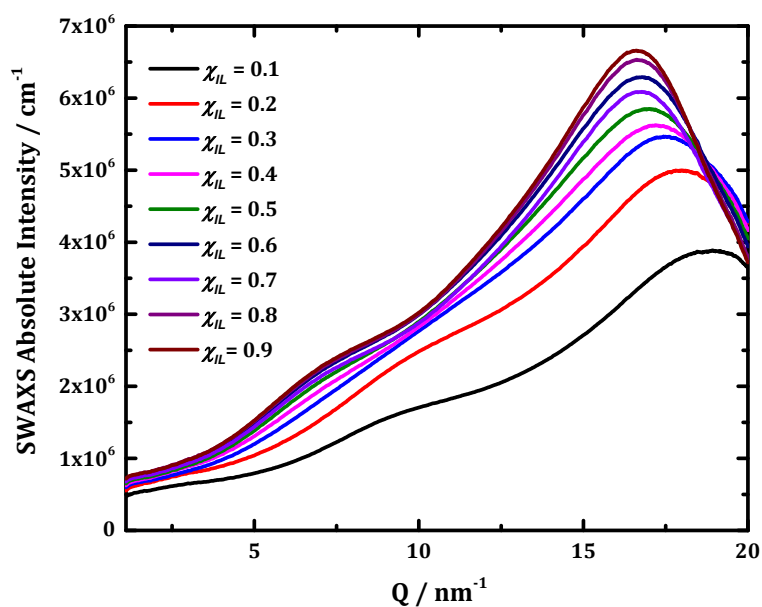

**Figure S5.** SWAXS patterns of water binary mixtures with  $[\text{C}_2\text{MIm}][\text{CH}_3\text{CO}_2]$  for the composition  $\chi_{\text{IL}} = 0.1$  to 1 at  $25^\circ\text{C}$ .

## Supporting Information

**Table S1.** Density data for pure ionic liquids, and the respective copper salt and nanofluid solutions.

| T/°C | $\rho$ (g·cm <sup>-3</sup> ) of solutions containing [C <sub>2</sub> MIm][CH <sub>3</sub> CO <sub>2</sub> ] |             |           | $\rho$ (g·cm <sup>-3</sup> ) of solutions containing [C <sub>2</sub> MIm][C <sub>3</sub> H <sub>7</sub> CO <sub>2</sub> ] |             |           | $\rho$ (g·cm <sup>-3</sup> ) of solutions containing [C <sub>2</sub> MIm][C <sub>7</sub> H <sub>15</sub> CO <sub>2</sub> ] |             |           |
|------|-------------------------------------------------------------------------------------------------------------|-------------|-----------|---------------------------------------------------------------------------------------------------------------------------|-------------|-----------|----------------------------------------------------------------------------------------------------------------------------|-------------|-----------|
|      | Pure IL                                                                                                     | Copper salt | Nanofluid | Pure IL                                                                                                                   | Copper salt | Nanofluid | Pure IL                                                                                                                    | Copper salt | Nanofluid |
| 20   | 1.0999                                                                                                      | --          | 1.1245    | 1.0640                                                                                                                    | 1.0762      | 1.0721    | 1.0053                                                                                                                     | 1.0117      | 1.0103    |
| 25   | 1.0968                                                                                                      | 1.1255      | 1.1209    | 1.0610                                                                                                                    | 1.0730      | 1.0688    | 1.0022                                                                                                                     | 1.0090      | 1.0072    |
| 30   | 1.0936                                                                                                      | 1.1222      | 1.1173    | 1.0579                                                                                                                    | 1.0698      | 1.0656    | 0.9991                                                                                                                     | 1.0061      | 1.0040    |
| 40   | 1.0872                                                                                                      | 1.1155      | 1.1099    | 1.0514                                                                                                                    | 1.0632      | 1.0590    | 0.9928                                                                                                                     | 0.9998      | 0.9975    |
| 50   | 1.0810                                                                                                      | 1.1090      | 1.1022    | 1.0452                                                                                                                    | 1.0567      | 1.0525    | 0.9866                                                                                                                     | 0.9937      | 0.9910    |
| 60   | 1.0748                                                                                                      | 1.1026      | 1.0952    | 1.0390                                                                                                                    | 1.0503      | 1.0462    | 0.9804                                                                                                                     | 0.9875      | 0.9845    |
| 70   | 1.0687                                                                                                      | 1.0963      | 1.0883    | 1.0329                                                                                                                    | 1.0440      | 1.0399    | 0.9743                                                                                                                     | 0.9812      | 0.9779    |
| 80   | 1.0626                                                                                                      | 1.0899      | 1.0815    | 1.0269                                                                                                                    | 1.0376      | 1.0336    | 0.9682                                                                                                                     | 0.9748      | 0.9714    |
| 90   | 1.0567                                                                                                      | 1.0832      | 1.0748    | 1.0209                                                                                                                    | 1.0310      | 1.0273    | 0.9622                                                                                                                     | 0.9683      | 0.9646    |

**Table S2.** Temperature-dependent viscosity data for pure ILs and nanofluid solutions.

| $\eta$ (mPa·s) of solutions containing [C <sub>2</sub> MIm][CH <sub>3</sub> CO <sub>2</sub> ] |       |      |           | $\eta$ (mPa·s) of solutions containing [C <sub>2</sub> MIm][C <sub>3</sub> H <sub>7</sub> CO <sub>2</sub> ] |       |      |           | $\eta$ (mPa·s) of solutions containing [C <sub>2</sub> MIm][C <sub>7</sub> H <sub>15</sub> CO <sub>2</sub> ] |       |      |           |
|-----------------------------------------------------------------------------------------------|-------|------|-----------|-------------------------------------------------------------------------------------------------------------|-------|------|-----------|--------------------------------------------------------------------------------------------------------------|-------|------|-----------|
| T/°C                                                                                          | IL    | T/°C | Nanofluid | T/°C                                                                                                        | IL    | T/°C | Nanofluid | T/°C                                                                                                         | IL    | T/°C | Nanofluid |
| 20.0                                                                                          | 198.9 | 20.0 | 300.4     | 20.1                                                                                                        | 408.8 | 20.1 | 258.4     | 20.0                                                                                                         | 711.6 | 20.1 | 509.1     |
| 25.0                                                                                          | 141.8 | 25.0 | 207.6     | 25.0                                                                                                        | 318.8 | 25.0 | 210.1     | 25.0                                                                                                         | 529.8 | 25.1 | 401.7     |
| 30.0                                                                                          | 103.8 | 30.2 | 150.1     | 30.1                                                                                                        | 231.9 | 30.2 | 157.3     | 30.0                                                                                                         | 398.3 | 30.3 | 291.7     |
| 50.0                                                                                          | 36.57 | 35.2 | 105.3     | 35.2                                                                                                        | 169.4 | 35.2 | 118.6     | 50.0                                                                                                         | 138.9 | 35.2 | 213.4     |
| 55.0                                                                                          | 29.37 | 40.1 | 70.63     | 40.2                                                                                                        | 126.0 | 40.2 | 90.25     | 55.0                                                                                                         | 108.9 | 40.2 | 158.5     |
| 60.0                                                                                          | 23.91 | 45.1 | 47.07     | 45.2                                                                                                        | 96.09 | 45.2 | 67.82     | 60.0                                                                                                         | 86.04 | 45.2 | 120.2     |
| 70.0                                                                                          | 16.43 | 50.1 | 31.01     | 50.2                                                                                                        | 73.60 | 50.2 | 53.48     | 70.0                                                                                                         | 54.79 | 50.3 | 92.62     |
| 80.0                                                                                          | 11.77 | 55.2 | 20.70     | 55.2                                                                                                        | 57.23 | 55.2 | 43.03     | 75.0                                                                                                         | 44.16 | 55.2 | 73.14     |
| 85.0                                                                                          | 10.09 | 60.1 | 15.10     | 60.2                                                                                                        | 45.13 | 60.1 | 35.28     | 80.0                                                                                                         | 35.80 | 60.2 | 58.68     |
| 90.0                                                                                          | 8.726 | 65.1 | 12.46     | 65.1                                                                                                        | 37.11 | 65.1 | 29.59     | 90.0                                                                                                         | 23.94 | 65.2 | 47.97     |
|                                                                                               |       | 70.1 | 11.12     | 70.1                                                                                                        | 31.21 | 70.1 | 24.99     |                                                                                                              |       | 70.2 | 39.70     |
|                                                                                               |       | 75.1 | 9.475     | 75.1                                                                                                        | 26.49 | 75.1 | 21.40     |                                                                                                              |       | 75.0 | 33.03     |
|                                                                                               |       | 80.1 | 8.250     | 80.1                                                                                                        | 22.46 | 80.1 | 18.36     |                                                                                                              |       | 80.0 | 27.28     |
|                                                                                               |       | 85.1 | 7.293     | 85.1                                                                                                        | 18.94 | 85.1 | 15.58     |                                                                                                              |       | 85.0 | 22.86     |
|                                                                                               |       | 90.0 | 6.493     | 90.1                                                                                                        | 15.81 | 90.0 | 13.13     |                                                                                                              |       | 90.0 | 19.13     |
|                                                                                               |       | 95.0 | 5.749     | 95.1                                                                                                        | 13.23 | 95.0 | 11.08     |                                                                                                              |       | 95.0 | 16.36     |
|                                                                                               |       |      |           |                                                                                                             |       |      |           |                                                                                                              |       | 99.9 | 14.40     |

## Supporting Information

**Table S3.** VFT-fitting parameters determined by correlating viscosity data (Table S2) using the VFT equation (Eq. S1) as a function of temperature from 20 °C to 100 °C at 0.1 MPa.

|                            | [C <sub>2</sub> MIm][CH <sub>3</sub> CO <sub>2</sub> ] |           | [C <sub>2</sub> MIm][C <sub>3</sub> H <sub>7</sub> CO <sub>2</sub> ] |           | [C <sub>2</sub> MIm][C <sub>7</sub> H <sub>15</sub> CO <sub>2</sub> ] |           |
|----------------------------|--------------------------------------------------------|-----------|----------------------------------------------------------------------|-----------|-----------------------------------------------------------------------|-----------|
|                            | IL                                                     | Nanofluid | IL                                                                   | Nanofluid | IL                                                                    | Nanofluid |
| <i>A</i> / mPa·s           | 0.03831                                                | 0.06335   | 0.02102                                                              | 0.05896   | 0.01164                                                               | 0.01722   |
| <i>B</i> / K <sup>-1</sup> | 1039.72                                                | 668.427   | 1385.54                                                              | 1050.43   | 1772.15                                                               | 1522.92   |
| <i>T</i> <sub>0</sub> / K  | 171.61                                                 | 215.76    | 153.78                                                               | 169.41    | 133.21                                                                | 146.36    |

$$\eta = A \times \exp\left(\frac{B}{T - T_0}\right) \quad (\text{S1})$$
